# Supplementary material for: Tannic acid-loaded mesoporous silica for rapid hemostasis and antibacterial activity
Source: Royal Society of Chemistry journal article supplement (doi:10.1039/c8bm00837j), 2018-01-01
Supplement: c8bm00837j1.pdf [file c8bm00837j1.pdf]

**Electronic Supplementary Information**

**Tannic acid loaded mesoporous silica for hemostasis  
and antibacterial**

**Chengwei Wang <sup>a, b, c</sup>, Huayi Zhou <sup>a, b</sup>, Haoyi Niu <sup>a, b</sup>, Xiaoyu Ma <sup>a, b</sup>, Yuan Yuan <sup>a, c \*</sup>, Hua  
Hong <sup>a, c \*</sup>, Changsheng Liu <sup>a, b \*</sup>**

*a, Key Laboratory for Ultrafine Materials of Ministry of Education, East China University of  
Science and Technology, Shanghai 200237, PR China.*

*b, Engineering Research Center for Biomedical Materials of Ministry of Education, East China  
University of Science and Technology, Shanghai 200237, PR China*

*c, Shanghai Wego Biological Technology Co., Ltd, Shanghai 200237, PR China*

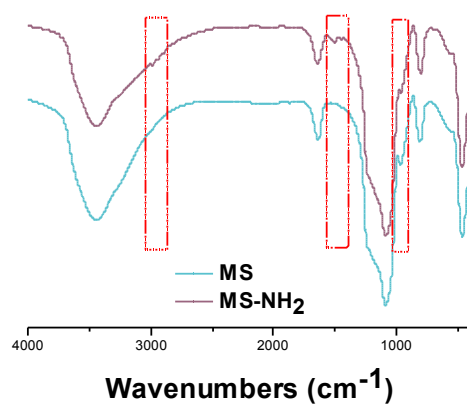

Figure S1 FTIR spectra of MS and MS-NH<sub>2</sub>

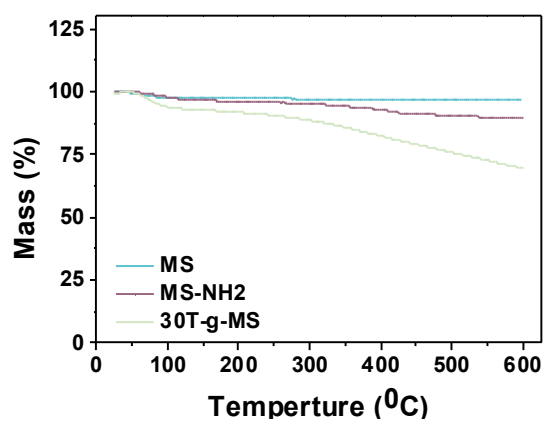

Figure S2 TG characterization of MS, MS-NH<sub>2</sub> and 30T-g-MS

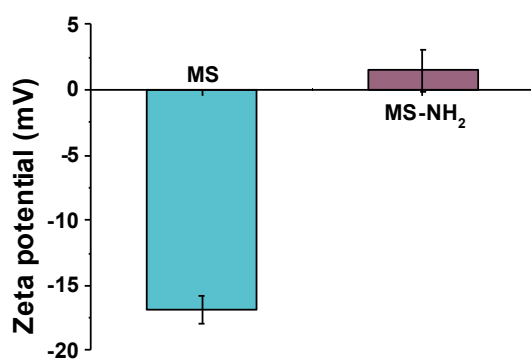

Figure S3 Zeta potential of MS and MS-NH<sub>2</sub>

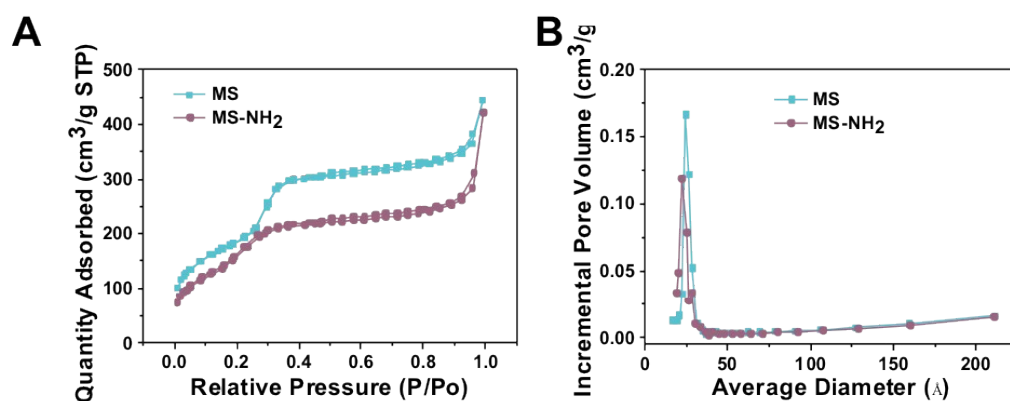

Figure S4 A) N<sub>2</sub> adsorption/desorption isotherms of MS and MS-NH<sub>2</sub>. B) The corresponding pore-size distribution of MS and MS-NH<sub>2</sub>.

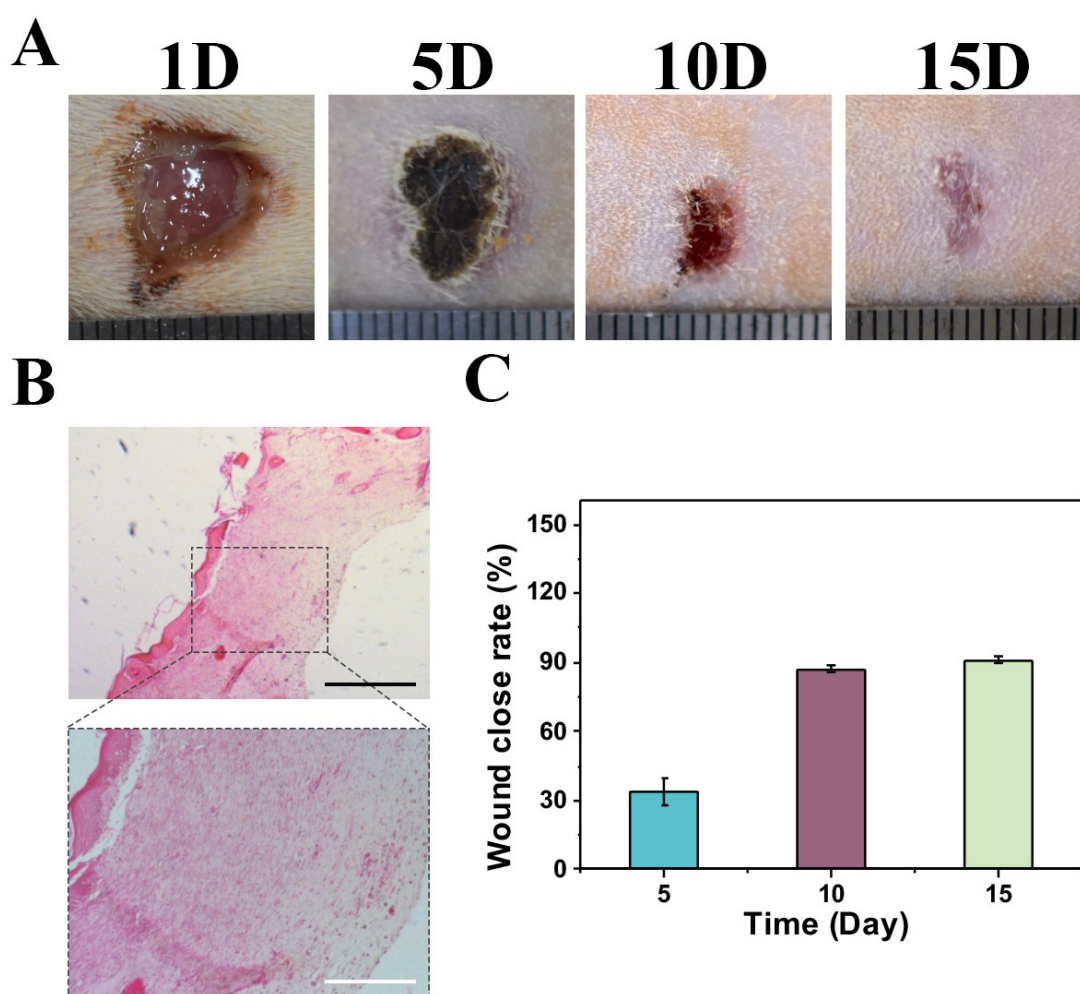

Figure S5 The wound healing processes under treatments of TA. A) Photographs of the appearance of different wounds on days 1, 5, 10 and 15 postoperation with the treatment of TA. B) H & E staining of the wounds treated with TA at day 15 postoperation. C) The wound closure rate of TA treated on different days postoperation. (Scale bar: black 200 μm, white, 100 μm)
